# Supplementary material
Source: PubMed Central journal article supplement (PMC7455085)
Supplement: jciinsight-5-136706-s007.pdf [file jciinsight-5-136706-s007.pdf]

## **Erythromycin inhibits neutrophilic inflammation and mucosal disease by upregulating DEL-1**

Tomoki Maekawa<sup>1,2,3,§,\*</sup>, Hikaru Tamura<sup>1,2,3</sup>, Hisanori Domon<sup>1,2</sup>, Takumi Hiyoshi<sup>1,2</sup>, Toshihito Isono<sup>2</sup>, Daisuke Yonezawa<sup>1,4</sup>, Naoki Hayashi<sup>5</sup>, Naoki Takahashi<sup>3</sup>, Koichi Tabeta<sup>3</sup>, Takeyasu Maeda<sup>1,6</sup>, Masataka Oda<sup>5</sup>, Athanasios Ziogas<sup>7</sup>, Vasileia Ismini Alexaki<sup>7</sup>, Triantafyllos Chavakis<sup>7,8</sup>, and Yutaka Terao<sup>1,2,§</sup> and George Hajishengallis<sup>9,§</sup>

<sup>1</sup> Research Center for Advanced Oral Science, Graduate School of Medical and Dental Sciences, Niigata University, Niigata, Japan

<sup>2</sup> Division of Microbiology and Infectious Diseases, Graduate School of Medical and Dental Sciences, Niigata University, Niigata, Japan

<sup>3</sup> Division of Periodontology, Graduate School of Medical and Dental Sciences, Niigata University, Niigata, Japan

<sup>4</sup> Division of Oral Science for Health Promotion, Graduate School of Medical and Dental Sciences, Niigata University, Niigata, Japan

<sup>5</sup> Department of Microbiology and Infection Control Sciences, Kyoto Pharmaceutical University, Yamashina, Kyoto, Japan

<sup>6</sup> Faculty of Dental Medicine, University of Airlangga, Surabaya, Indonesia

<sup>7</sup> Institute of Clinical Chemistry and Laboratory Medicine, University Clinic and Faculty of Medicine Carl Gustav Carus, TU Dresden, Dresden, Germany

<sup>8</sup> Centre for Cardiovascular Science, Queen's Medical Research Institute, University of Edinburgh, Edinburgh, UK

<sup>9</sup> Department of Basic and Translational Sciences, Laboratory of Innate Immunity and Inflammation, Penn Dental Medicine, University of Pennsylvania, Philadelphia, PA, USA

§ Contributed equally as senior authors to this work.

\* Address correspondence to: Research Center for Advanced Oral Science, Graduate School of Medical and Dental Sciences, 2-5274, Gakkocho-dori, Chuo-ku, Niigata-shi, 951-8514, Japan. Phone: 81.25.227.2828; Email: maekawa-t@dent.niigata-u.ac.jp

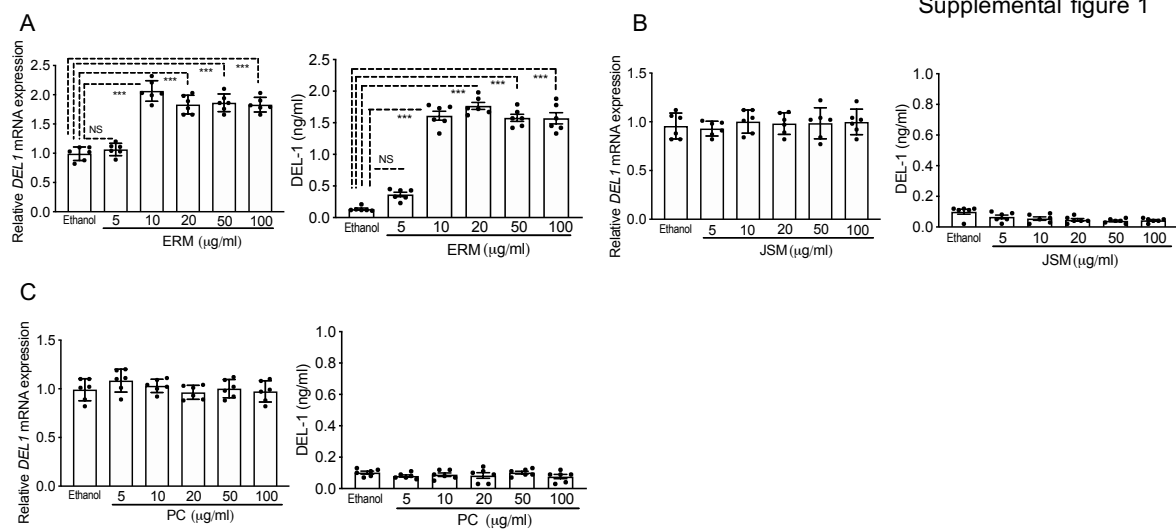

**Supplementary figure 1: Dose-response experiments of macrolides and PC used in the study.**

HMVECs were treated with the indicated concentrations of macrolides (ERM (A) and JSM (B)) and PC (C) for 3h to determine *Dell* mRNA expression by qPCR (left panels) or 6h to determine DEL-1 protein levels in culture supernatants by ELISA (right panels). mRNA data were normalized against *Gapdh* mRNA and expressed as fold induction relative to control vehicle ethanol, which was assigned an average value of 1. Data are presented as the mean  $\pm$  SD. \*\*\* $P < 0.0001$  by the One-way ANOVA followed by Tukey's multiple comparison test, NS: not significant.

## Supplemental figure 2

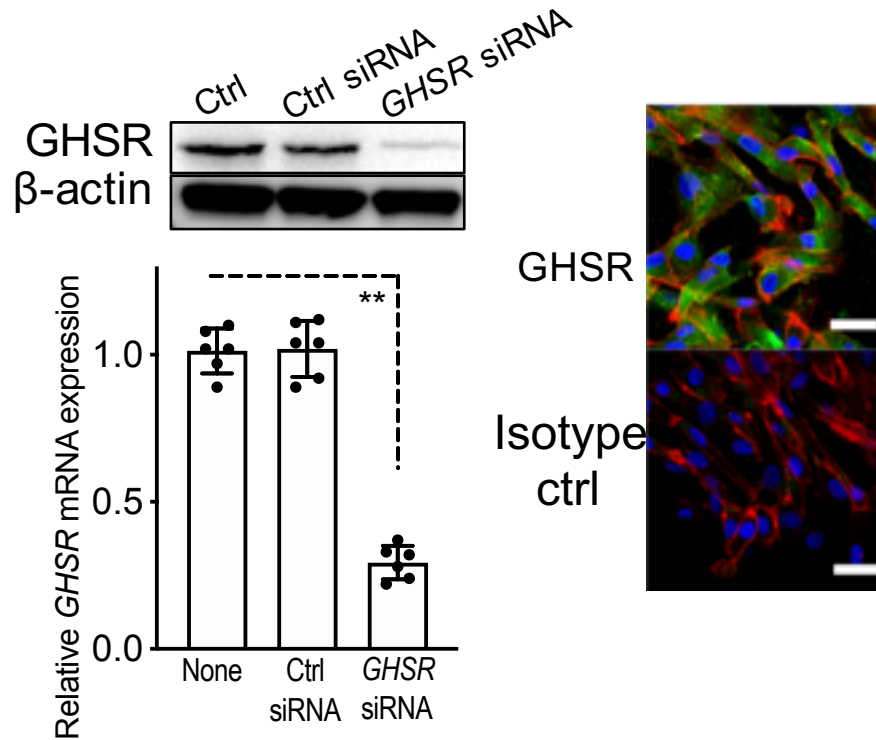

### Supplementary figure 2: HMVEC expresses GHSR

HMVECs were treated with siRNA to *GHSR* or control siRNA and 24h later were assessed for expression of GHSR at the protein (upper left panel) and mRNA level (lower left panel) by WB and qPCR, respectively (n=6 sets of cultures/group). The mRNA data were normalized against *Gapdh* mRNA and expressed as fold induction relative to untreated control ('none'), which was assigned an average value of 1. Immunofluorescence analysis of GHSR in HMVECs (right panel). The cells were labeled with GHSR (green), Nuclei (blue) and F-actin (red). Lower panel represents HMVECs stained with isotype control antibody to assess background. Scale bars, 10  $\mu$ m.

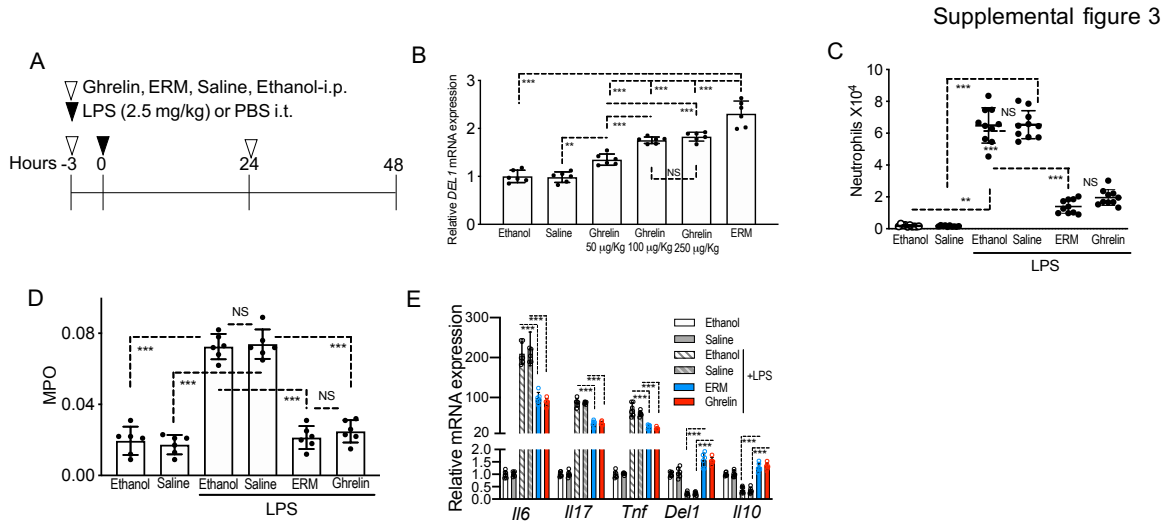

### Supplementary figure 3: Ghrelin upregulates DEL-1 mRNA and suppress neutrophil infiltration in BALF.

(A) Experimental design. *E. coli* LPS (2.5mg/kg) was administrated intratracheally. ERM, ghrelin, ethanol (vehicle control for ERM) or saline (vehicle control for ghrelin) (n = 10 mice/group) was administrated i.p. 3h before and 24h after LPS administration. Samples were collected 48h after LPS administration. (B) *Del1* mRNA transcription in the lung tissue was analyzed by qPCR 24h after i.p. injection the indicated concentrations of ghrelin, ERM (20 mg/kg), or controls (ethanol, or saline). Data were normalized against *Gapdh* mRNA and expressed as fold induction relative to treatment with ethanol or saline control, each of which was assigned an average value of 1. Data are presented as the mean  $\pm$  SD; (n = 6 mice/group). (C, D) Neutrophil counts (C) and MPO activity (D) in the bronchoalveolar lavage fluid (BALF) 48h after LPS challenge, or not, in mice which received i.p. injection with ERM (20 mg/kg), or ghrelin (100 µg/ml), or their respective vehicle control, according to the scheme in panel A. (B; n = 10 mice/group, C; n = 6 mice/group). (E) The mRNA levels of pro-inflammatory cytokines (*Il6*, *Il17*, and *Tnf*), *Del1*, and *Il10* in the lung tissue of the same groups of mice described in C and D was determined by qPCR 48h after LPS challenge (n = 6 mice/group). Data were normalized against *Gapdh* mRNA and expressed as fold induction relative to treatment with ethanol control, which was assigned an average value of 1. One-way ANOVA followed by Tukey's multiple comparison test, \*\*P < 0.001, \*\*\*P < 0.0001

between indicated groups, NS: not significant.
